# Supplementary material for: Linker histone H1 is present in centromeric chromatin of living human cells next to inner kinetochore proteins
Source: PubMed Central journal article supplement — Nucleic Acids Res. 2009 Mar 31;37(10):3391–406. doi: 10.1093/nar/gkp199 (PMC2691837; doi:10.1093/nar/gkp199), 2009-03-31
Supplement: gkp199_1.pdf [file gkp199_1.pdf]

|      | average pixel intensity |             | number of centromeres |
|------|-------------------------|-------------|-----------------------|
|      | Nucleus                 | Centromeres |                       |
| H1x  | 41                      | 57±19       | 16                    |
|      | 62                      | 65±23       | 13                    |
| H1°  | 74                      | 73±22       | 26                    |
|      | 86                      | 89±20       | 13                    |
| H1.3 | 61                      | 58±17       | 19                    |
|      | 82                      | 65±16       | 16                    |
| H1.5 | 97                      | 100±24      | 14                    |
|      | 94                      | 79±16       | 17                    |
|      | 95                      | 91±26       | 14                    |

Supplemental Table 1
